# Supplementary material
Source: ML conference proceedings conference paper supplement (https://aclanthology.org/D19-1656)
Supplement: Attachment [file D19-1656.Attachment.zip]

## A Appendices

### A.1 Lexicons

|         |       |       |         |
|---------|-------|-------|---------|
| cry     | punch | blood | knife   |
| flower  | moon  | wind  | exclaim |
| chuckle | tear  | punch | yell    |
| kiss    | touch | warm  | dead    |
| shiver  | chill |       |         |

Table 5: Lexicons used to prune part of the data for labelling

### A.2 Sample Data

Table 6 shows sample passages from classic titles with corresponding labels.

| Text                                                                                                                                                                                                                                                                                                                                                                                                                                                                                                                         | Label   |
|------------------------------------------------------------------------------------------------------------------------------------------------------------------------------------------------------------------------------------------------------------------------------------------------------------------------------------------------------------------------------------------------------------------------------------------------------------------------------------------------------------------------------|---------|
| <i>He took his screwdriver and again took off the lid of the coffin. Arthur looked on, very pale but silent. When the lid was removed he stepped forward. He evidently did not know that there was a leaden coffin, or at any rate, had not thought of it. When he saw the rent in the lead, the blood rushed to his face for an instant, but as quickly fell away again, so that he remained of a ghastly whiteness. He was still silent. Van Helsing forced back the leaden flange, and we all looked in and recoiled.</i> | Fear    |
| <i>The chair went to matchwood at the bottom, and we rolled apart into the gutter. He sprang to his feet, waving his fists and wheezing like an asthmatic. "Had enough?" he panted. "You infernal bully!" I cried, as I gathered myself together.</i>                                                                                                                                                                                                                                                                        | Anger   |
| <i>The judges sat grave and mute, gave me an easy hearing, and time to say all that I would, but, saying neither Yes nor No to it, pronounced the sentence of death upon me, a sentence that was to me like death itself, which, after it was read, confounded me. I had no more spirit left in me, I had no tongue to speak, or eyes to look up either to God or man.</i>                                                                                                                                                   | Sadness |
| <i>The Prince burst into a yelling, shrieking fit of laughter. Instantly the yellow-haired serfs in waiting, the Calmucks at the hall-door, and the half-witted dwarf who crawled around the table in his tow shirt, began laughing in chorus, as violently as they could. The Princess Martha and Prince Boris laughed also; and while the old man's eyes were dimmed with streaming tears of mirth, quickly exchanged nods. The sound extended all over the castle, and was heard outside of the walls.</i>                | Joy     |
| <i>"Do not be such an unreasonable child", he remonstrated, feebly. "I do not love you with the wild, irrational passion of former years; but I have the tenderest regard for you, and my heart warms at the sight of your sweet face, and I shall do all in my power to make you as happy as any man can make you who—"</i>                                                                                                                                                                                                 | Love    |
| <i>I looked around for his birds, and not seeing them, asked him where they were. He replied, without turning round, that they had all flown away. There were a few feathers about the room and on his pillow a drop of blood. I said nothing, but went and told the keeper to report to me if there were anything odd about him during the day.</i>                                                                                                                                                                         | Neutral |

Table 6: Sample data from classic titles
